# Supplementary material for: Maternal Infection and Adverse Pregnancy Outcomes among Pregnant Travellers: Results of the International Zika Virus in Pregnancy Registry
Source: Viruses. 2021 Feb 22;13(2):341. doi: 10.3390/v13020341 (PMC7926842; doi:10.3390/v13020341)
Supplement: Supplementary file 1 [file viruses-13-00341-s001.pdf]

## Supplementary Material

| Major signs                  |                                                                                                                                                                                                 | Minor signs                                                                              |
|------------------------------|-------------------------------------------------------------------------------------------------------------------------------------------------------------------------------------------------|------------------------------------------------------------------------------------------|
| <b>Prenatal</b>              |                                                                                                                                                                                                 |                                                                                          |
| <b>Ultrasound</b>            |                                                                                                                                                                                                 |                                                                                          |
| <b>Cerebral</b>              | Ventriculomegaly<br>Abnormal gyration pattern<br>Increased cisterna magna > 8mm<br>Vermian dysgenesis<br>Agenesis/dysgenesis of corpus callosum                                                 | Calcifications<br>Hypoplasia of the basal ganglia                                        |
| <b>Extracerebral</b>         | Fetal hydrops<br>Arthrogryposis                                                                                                                                                                 | IUGR < P10<br>Ascites, subcutaneous edema<br>ocular anomalies                            |
| <b>Postnatal</b>             |                                                                                                                                                                                                 |                                                                                          |
| <b>Clinical signs</b>        | Hypertonia<br>Swallowing disorder<br>HC < 3SD<br>Arthrogryposis<br>Macular anomalies<br>Abnormal cerebral MRI<br>Abnormal cerebral ultrasound with the exception of periventricular hemorrhagic | jaundice<br>Hepatomegaly<br>HC < 2SD<br>Abnormal audiology<br>Anterior segment anomalies |
| <b>Biological parameters</b> |                                                                                                                                                                                                 | Hb < 140 g/l<br>Tc < 100 G/L                                                             |

**Scheme S1.** Criteria used to diagnose the severity of congenital Zika virus syndrome. Major signs were attributed three points, while minor signs were attributed one point. Foetuses/neonates were considered asymptomatic/pauci-symptomatic with a score  $\leq 1$ , symptomatic with a score  $\geq 2$ , and severely affected with a score  $\geq 3$ .

|                                   | Pregnant travellers            |                  |                                  |                   | Pregnant residents             |                  |                                  |                  |
|-----------------------------------|--------------------------------|------------------|----------------------------------|-------------------|--------------------------------|------------------|----------------------------------|------------------|
|                                   | Recent maternal ZIKV infection |                  | Negative maternal ZIKV infection |                   | Recent maternal ZIKV infection |                  | Negative maternal ZIKV infection |                  |
|                                   | n (%)                          | 95% CI           | n (%)                            | 95% CI            | n (%)                          | 95% CI           | n (%)                            | 95% CI           |
| <b>Fetal/neonatal testing</b>     |                                |                  |                                  |                   |                                |                  |                                  |                  |
| <b>Known</b>                      | 23 (63.9)                      | 47.6-77.5        | 6 (5.6)                          | 2.6-11.6          | 293 (94.8)                     | 91.7-96.8        | 340 (82.5)                       | 78.6-85.9        |
| <b>Positive</b>                   | <b>5 (21.7)</b>                | <b>9.7-41.0</b>  | <b>0 (0.0)</b>                   | n.a.              | <b>76 (24.6)</b>               | <b>20.1-29.7</b> | <b>1 (0.2)</b>                   | <b>0.0-1.4</b>   |
| Asymptomatic                      | 2 (40.0)                       | n.a.             | n.a. n.a.                        | n.a.              | 33 (43.4)                      | 32.9-54.6        | 1 (100.0)                        | n.a.             |
| Severe adverse pregnancy outcomes | 3 (60.0)                       | n.a.             | n.a. n.a.                        | n.a.              | 28 (36.8)                      | 26.9-48.1        | 0 (0.0)                          | n.a.             |
| <b>Negative</b>                   | <b>18 (78.3)</b>               | <b>58.1-90.3</b> | <b>6 (100.0)</b>                 | <b>61.0-100.0</b> | <b>217 (70.2)</b>              | <b>64.9-75.1</b> | <b>339 (82.3)</b>                | <b>78.5-85.9</b> |
| Asymptomatic                      | 18 (100)                       | 83.4-100.0       | 6 (100.0)                        | n.a.              | 188 (86.6)                     | 81.5-90.5        | 294 (86.7)                       | 82.7-89.9        |
| Severe adverse pregnancy outcomes | 0 (0.0)                        | 0.0-17.6         | 0 (0.0)                          | n.a.              | 11 (5.1)                       | 2.9-8.8          | 19 (5.6)                         | 3.6-8.6          |
| <b>Unknown</b>                    | <b>13 (36.1)</b>               | <b>22.5-52.4</b> | <b>102 (94.4)</b>                | <b>88.4-97.4</b>  | <b>16 (5.2)</b>                | <b>3.2-8.2</b>   | <b>72 (17.5)</b>                 | <b>13.9-21.2</b> |
| Asymptomatic                      | 13 (100)                       | 77.2-100.0       | 97 (95.1)                        | 89.0-97.9         | 16 (100.0)                     | 80.6-100.0       | 70 (97.2)                        | 90.4-99.2        |
| Severe adverse pregnancy outcomes | 0 (0.0)                        | 0-22.8           | 4 (3.9)                          | 1.5-9.7           | 0 (0.0)                        | 0.0-19.4         | 2 (2.8)                          | 0.8-9.6          |

**Scheme S2.** Adverse pregnancy outcomes according to results of foetal/neonatal ZIKV testing among pregnant travellers compared to pregnant residents.

| Positive recent maternal ZIKV infection |                                                                                             |                                                                                                           |                                                                                                                  |  |
|-----------------------------------------|---------------------------------------------------------------------------------------------|-----------------------------------------------------------------------------------------------------------|------------------------------------------------------------------------------------------------------------------|--|
|                                         | Case 1                                                                                      | Case 2                                                                                                    | Case 3                                                                                                           |  |
| <b>Outcome</b>                          |                                                                                             |                                                                                                           |                                                                                                                  |  |
| Outcome                                 | Severe cerebral anomalies (IUGR ventriculomegaly, cerebral calcifications)                  | Severe cerebral anomalies (ventriculomegaly, abnormal corpus callosum, calcifications, abnormal gyration) | Termination of pregnancy 14 WG for severe cerebral anomalies (ventriculomegaly, bilateral fetal neck collection) |  |
| GA at first anomaly seen                | Liveborn 37 WG; 1810g, HC 26 cm                                                             | Liveborn 37 WG, 2540g HC 30cm                                                                             |                                                                                                                  |  |
| <b>Maternal characteristics</b>         |                                                                                             |                                                                                                           |                                                                                                                  |  |
| Maternal age                            | 26 WG                                                                                       | 19WG                                                                                                      | 14 WG                                                                                                            |  |
| Gestity/ Parity                         | 30 y.o.                                                                                     | 41 y.o.                                                                                                   | 29 y.o.                                                                                                          |  |
| Maternal country                        | 4/1                                                                                         | 4/1                                                                                                       | 4/3                                                                                                              |  |
| Maternal comorbidities                  | North America                                                                               | Europe                                                                                                    | North America                                                                                                    |  |
| Maternal serologies                     | None                                                                                        | None                                                                                                      | None                                                                                                             |  |
| DS screening                            | Toxo neg; CMV neg; VZV ? ; HSV pos; Rub pos ; PVB19 neg ; Syph neg ; HIV neg; HCV ? ; HBV ? | Toxo neg; CMV ?; VZV ?; HSV ?; Rub pos;PVB19?; HIV neg; HCV neg; HBV neg                                  | Toxo ?; CMV ? ; VZV ? ; HSV ? ; Rub ? ; HIV ? ; HCV ? ; HBV ?                                                    |  |
| <b>Fetal/neonatal investigations</b>    |                                                                                             |                                                                                                           |                                                                                                                  |  |
| Amniocentesis                           | Normal 12 WG                                                                                | ?                                                                                                         | ?                                                                                                                |  |
| Fetal ZIKV testing                      | not performed                                                                               | 19 WG                                                                                                     | not performed                                                                                                    |  |
| Placenta ZIKV testing                   | not performed                                                                               | PCR pos                                                                                                   | PCR pos                                                                                                          |  |
| Neonatal ZIKV testing                   | not performed                                                                               | PCR neg                                                                                                   | PCR pos                                                                                                          |  |
| Neonatal TORCH testing                  | 5d - PCR neg; IgM pos                                                                       | not performed                                                                                             | n.a.                                                                                                             |  |
| Genetic testing                         | CMV neg                                                                                     | CMV neg                                                                                                   | n.a.                                                                                                             |  |
| Screening for metabolic disorders       | ?                                                                                           | ?                                                                                                         | not performed                                                                                                    |  |
| <b>Maternal exposition</b>              |                                                                                             |                                                                                                           |                                                                                                                  |  |
| Region of travel                        | normal                                                                                      | normal                                                                                                    | not performed                                                                                                    |  |
| Timing of travel                        | South America                                                                               | South America                                                                                             | Caribbean Islands                                                                                                |  |
| Length of stay                          | During the epidemic                                                                         | During the epidemic                                                                                       | During the epidemic                                                                                              |  |
| Use of mosquitoes' repellent            | > 2 weeks - < 3 weeks                                                                       | > 4 weeks                                                                                                 | ?                                                                                                                |  |
| Timing of infection                     | ?                                                                                           | ?                                                                                                         | ?                                                                                                                |  |
| maternal symptoms                       | 1T                                                                                          | 1T (6 WG )                                                                                                | 1T (9WG)                                                                                                         |  |
| Maternal ZIKV diagnosis                 | no                                                                                          | yes                                                                                                       | yes                                                                                                              |  |
|                                         | IgM pos, Blood NAAT neg 37 WG                                                               | Blood NAAT pos at 12 WG                                                                                   | Blood NAAT pos at 12 WG; IgM pos at 13WG                                                                         |  |

  

| Negative recent maternal infection   |                                                                                                        |                                                                         |                                                                           |                                                                               |
|--------------------------------------|--------------------------------------------------------------------------------------------------------|-------------------------------------------------------------------------|---------------------------------------------------------------------------|-------------------------------------------------------------------------------|
|                                      | Case 1                                                                                                 | Case 2                                                                  | Case 3                                                                    | Case 4                                                                        |
| <b>Outcome</b>                       |                                                                                                        |                                                                         |                                                                           |                                                                               |
| Outcome                              | TOP 34WG for severe cerebral anomalies (abnormal gyration, ventriculomegaly) hepatomegaly, dysmorphism | IUGR, hypospadias, oligohydramnios, small thick placenta, polydactyly   | Hydrops fetalis and choledochal cyst                                      | Isolated macular anomalies                                                    |
| GA at first anomaly seen             | Preterm delivery 27 WG, C-section, 720g, HIV 33cm HC                                                   | Preterm birth 33WG, C-section, 2180g, 33cm HC,                          | Vaginal delivery 40 WG, 2970g, HC 33cm at birth                           |                                                                               |
| <b>Maternal characteristics</b>      |                                                                                                        |                                                                         |                                                                           |                                                                               |
| Maternal age                         | 21 WG                                                                                                  | 19 WG                                                                   | 18 WG                                                                     |                                                                               |
| Gravida/Parida                       | 35 y.o.                                                                                                | 43 y.o.                                                                 | 37 y.o.                                                                   | 31 y.o.                                                                       |
| Maternal Origin                      | 2/1                                                                                                    | 3/0                                                                     | 1/0                                                                       | 1/0                                                                           |
| Maternal comorbidities               | North America                                                                                          | North America                                                           | Europe                                                                    | Europe                                                                        |
| Maternal serologies                  | none                                                                                                   | none                                                                    | none                                                                      | none                                                                          |
| DS screening                         | Toxo -, CMV -, VZV ?, HSV -, PVB-19 ?, Rub +, Syph -, HIV -, HCV ?, HBV -                              | Toxo ?, CMV ?, VZV ?, HSV ?, Rub +, PVB-19 ?. Syph -, HIV -, HCV ?, HBV | Toxo +, CMV +, VZV +, HSV ?, Rub +, PVB-19 ?, Syph -, HIV -, HCV -, HBV - | Toxo -, CMV?, VZV ?, HSV ?, Rub ?, PVB-19 ?, Syph ?, HIV -, HCV -, HBV -      |
| <b>Fetal/neonatal investigations</b> |                                                                                                        |                                                                         |                                                                           |                                                                               |
| Amniocentesis                        | Normal NIPT 20 WG                                                                                      | Abnormal 1/6 , Normal NIPT                                              | Normal                                                                    |                                                                               |
| Fetal ZIKV testing                   | 34 WG                                                                                                  | not performed                                                           | not performed                                                             | not performed                                                                 |
| Placenta ZIKV testing                | not performed                                                                                          | not performed                                                           | not performed                                                             | not performed                                                                 |
| Neonatal ZIKV testing                | not performed                                                                                          | not performed                                                           | not performed                                                             |                                                                               |
| Neonatal TORCH testing               | not performed                                                                                          | not performed                                                           | not performed                                                             | Blood, urine, saliva and breast milk negative                                 |
| Genetic testing                      | ?                                                                                                      | not performed                                                           | not performed                                                             | not performed                                                                 |
| Screening for metabolic disorders    | Pathogenic 4q21 deletion                                                                               | 3q21 deletion; unknown clinical significance                            | not performed                                                             | not performed                                                                 |
| <b>Maternal exposition</b>           |                                                                                                        |                                                                         |                                                                           |                                                                               |
| Region of travel                     | ?                                                                                                      | normal                                                                  | not performed                                                             | not performed                                                                 |
| Timing of travel                     | South America                                                                                          | Caribbean Islands                                                       | Africa                                                                    | South America                                                                 |
| Length of stay                       | Outside the epidemic period                                                                            | Outside the epidemic period                                             | Outside the epidemic period                                               | Outside the epidemic period                                                   |
| Use of mosquitoes' repellent         | < 2 weeks                                                                                              | < 2 weeks                                                               | > 2 weeks - < 3 weeks                                                     | > 4 weeks                                                                     |
| Timing of exposition                 | ?                                                                                                      | no                                                                      | yes                                                                       | ?                                                                             |
| maternal symptoms                    | 1T                                                                                                     | Prior to pregnancy                                                      | 1T                                                                        | prior to pregnancy                                                            |
| Maternal ZIKV diagnosis              | no                                                                                                     | no                                                                      | no                                                                        | no                                                                            |
|                                      | IgM neg at 28 WG                                                                                       | IgM neg at 17 WG                                                        | Urine NAAT neg at 32 WG                                                   | Urine and Blood NAAT neg, IgM negative, IgG positive, PRNT positive at 10 WG, |

**Scheme S3.** Description of pregnant travellers presenting with severe adverse pregnancy outcomes. Abbreviations: HC, Head circumference; NAAT, Nucleic acids amplification test; Neg, negative; Pos, Positive; T, trimester; WG, weeks' gestation; y.o.; years old; ZIKV, Zika virus
